# Supplementary material
Source: MDPI journal article supplement (https://www.mdpi.com/2543-6031/90/4/36)

## PICOS and Search strategy

### A: PICOS

#### Study question:

Outcome of open lung biopsy in ARDS patients admitted to intensive care units.

**Population:** All patients admitted with ARDS to intensive care units

**Intervention:** Lung biopsy

**Comparison:** None

**Outcome:** Survival at discharge, rates of changes in management, pathologic diagnosis from lung biopsy, overall mortality outcome post lung biopsy.

**Study type:** Proportion meta-analysis

### B: Search strategy for outcome of open lung biopsy in ARDS patients admitted to intensive care units

#### 1). Cochrane total: 78

| #.            | Searches                                                                  | Results   |
|---------------|---------------------------------------------------------------------------|-----------|
| 1             | MeSH descriptor: [Respiratory Distress Syndrome, Adult] explode all trees | 1384      |
| 2             | MeSH descriptor: [Biopsy] explode all trees                               | 5693      |
| 3             | MeSH descriptor: [Lung] explode all trees                                 | 4192      |
| 4             | #2 OR #3                                                                  | 9747      |
| 5             | #4 AND #1                                                                 | 78        |
| <b>Trials</b> |                                                                           | <b>78</b> |
|               | Cochrane Reviews                                                          | 0         |
|               | Cochrane Protocols                                                        | 0         |
|               | Clinical Answers                                                          | 0         |

#### 2). OVID Search: 678

| # | Searches                               | Results |
|---|----------------------------------------|---------|
| 1 | Lung biopsy.mp.                        | 18668   |
| 2 | ARDS.mp.                               | 36804   |
| 3 | Acute respiratory distress syndrome.mp | 43668   |
| 4 | Outcomes.mp.                           | 2213535 |
| 5 | #2 OR #3                               | 59381   |
| 6 | #1 AND #5                              | 1831    |
| 7 | #6 AND #4                              | 678     |

#### 3). PubMed: 155

("ARDS" OR "Acute respiratory distress syndrome") AND ("Lung biopsy" OR "lung Histopathology")

**Total studies:** 911

**Duplicates:** 226

**Total studies qualified for abstract review:** 685 (Figure 1)

**Table S1.** Quality assessment of the studies as per modified tool for quality assessment for case series.

| <b>Study</b>       | <b>Domains</b> | <b>Selection</b> | <b>Ascertainment</b> | <b>Causality</b> | <b>Reporting</b> | <b>Total</b> |
|--------------------|----------------|------------------|----------------------|------------------|------------------|--------------|
| Ortiz              | ✓              | 1                | 2,3                  | 4,7              | 8                | 6            |
| Philipponnet       | ✓              | 1                | 2,3                  | 4,7              | 8                | 6            |
| Almotairi          | ✓              | 1                | 2,3                  | 4,7              | 8                | 6            |
| Gerard             | ✓              | 1                | 2,3                  | 4,7              | 8                | 6            |
| Arabi              | ✓              | 1                | 2,3                  | 4,7              | 8                | 6            |
| Barbas             | ✓              | 1                | 2,3                  | 4,7              | 8                | 6            |
| Baumann            | ✓              | 1                | 2,3                  | 4,7              | 8                | 6            |
| Canver             | ✓              | 1                | 2,3                  | 4,7              | 8                | 6            |
| Depuydt            | ✓              | 1                | 2,3                  | 4,7              | 8                | 6            |
| Flabouris          | ✓              | 1                | 2,3                  | 4,7              | 8                | 6            |
| Hughes             | ✓              | 1                | 2,3                  | 4,7              | 8                | 6            |
| Kao                | ✓              | 1                | 2,3                  | 4,7              | 8                | 6            |
| Lim                | ✓              | 1                | 2,3                  | 4,7              | 8                | 6            |
| Melo               | ✓              | 1                | 2,3                  | 4,7              | 8                | 6            |
| Papazion           | ✓              | 1                | 2,3                  | 4,7              | 8                | 6            |
| Papazion           | ✓              | 1                | 2,3                  | 4,7              | 8                | 6            |
| Patel              | ✓              | 1                | 2,3                  | 4,7              | 8                | 6            |
| Soh                | ✓              | 1                | 2,3                  | 4,7              | 8                | 6            |
| kapala 2005        | ✓              | 1                | 2,3                  | 4,7              | 8                | 6            |
| Monteiro 2005      | ✓              | 1                | 2,3                  | 4,7              | 8                | 6            |
| Charbonney<br>2009 | ✓              | 1                | 2,3                  | 4,7              | 8                | 6            |
| Guerin 2015        | ✓              | 1                | 2,3                  | 4,7              | 8                | 6            |

**Figure S1.** Pooled proportion of Diffuse alveolar damage on lung biopsy.

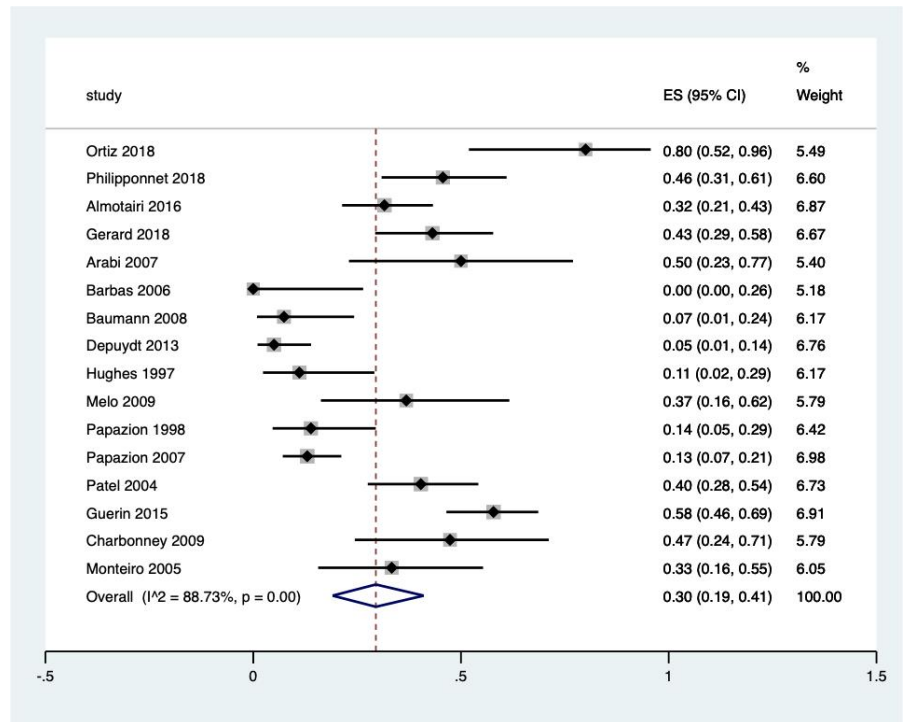

**Figure S2.** Pooled proportion of viral infection on lung biopsy.

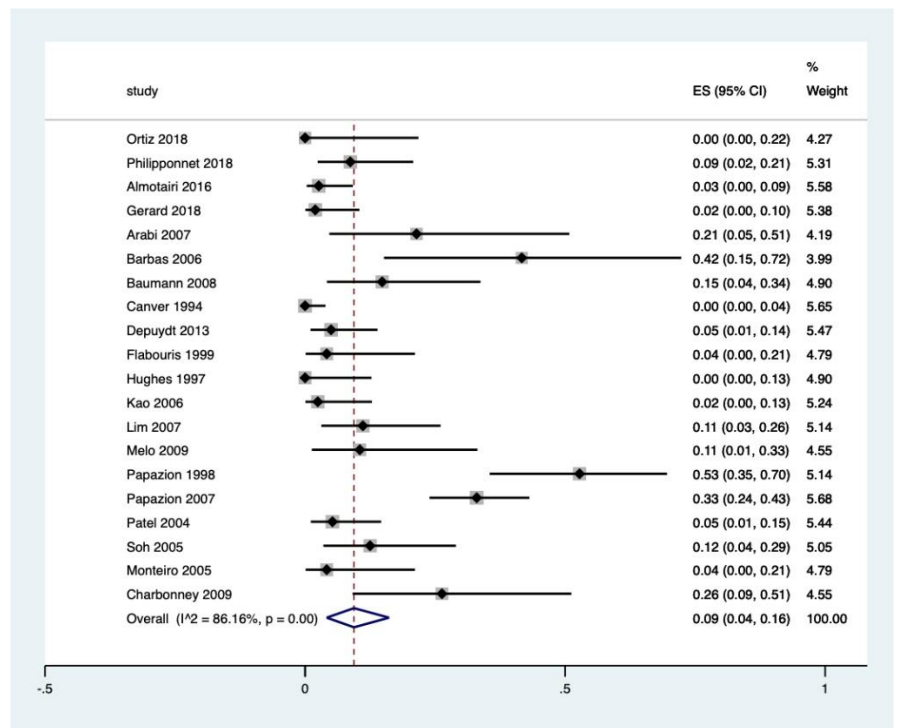

**Figure S3.** Pooled proportion of bacterial infection on lung biopsy.

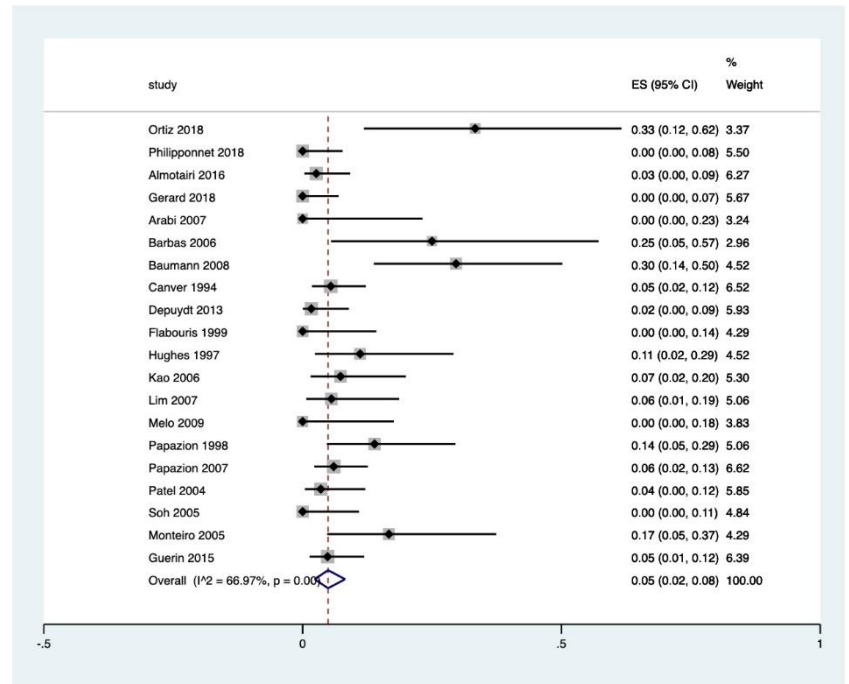

**Figure S4.** Pooled proportion of fungal infections on lung biopsy.

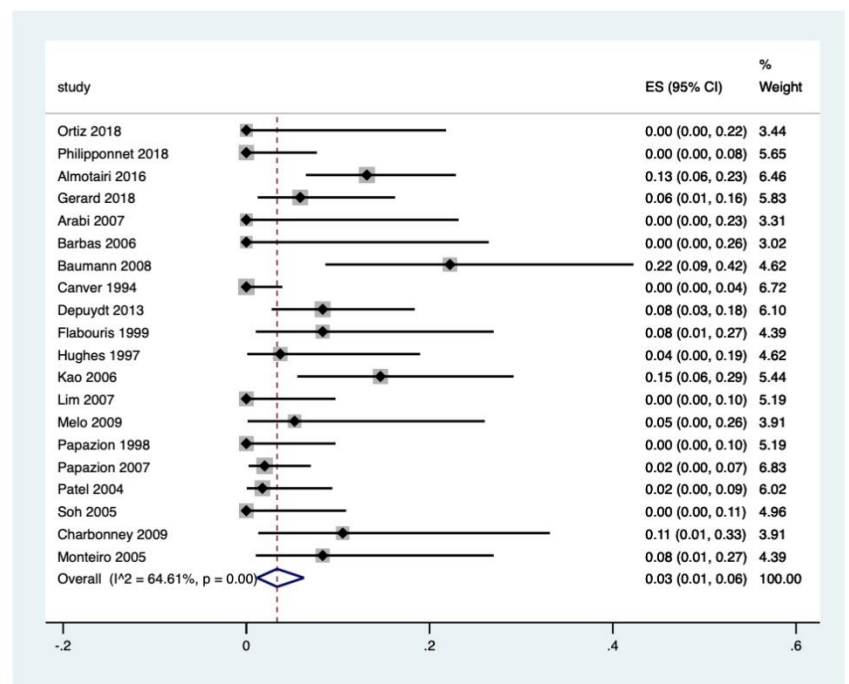

**Figure S5.** Pooled proportion of diffuse alveolar hemorrhage on lung biopsy.

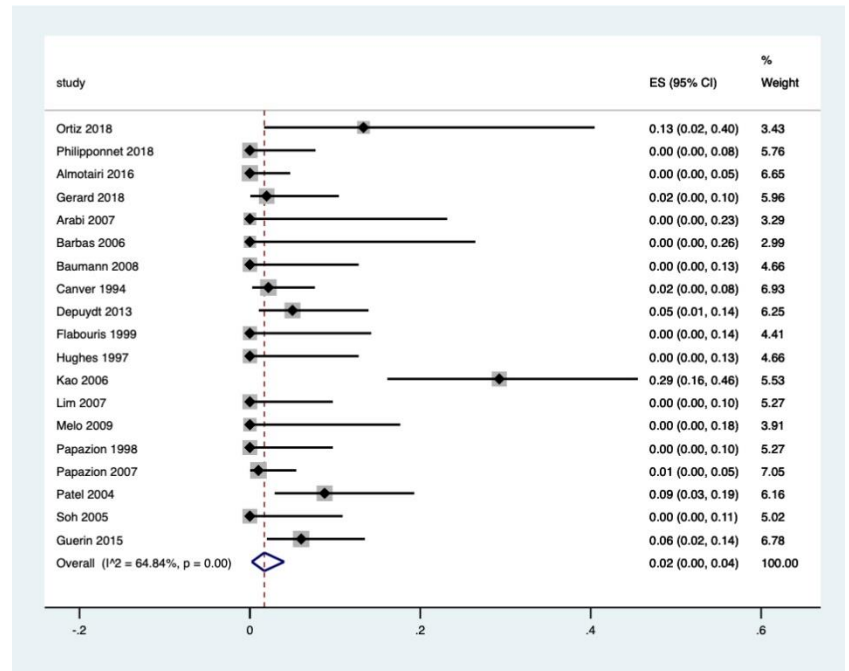

**Figure S6.** Pooled proportion of interstitial lung disease on lung biopsy.

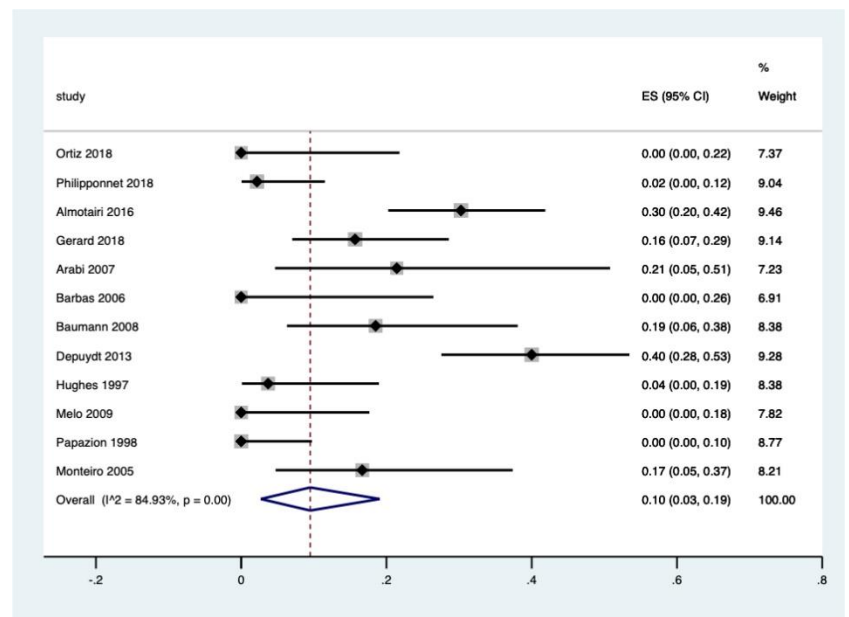

**Figure S7:** Pooled proportion of pneumonitis on lung biopsy.

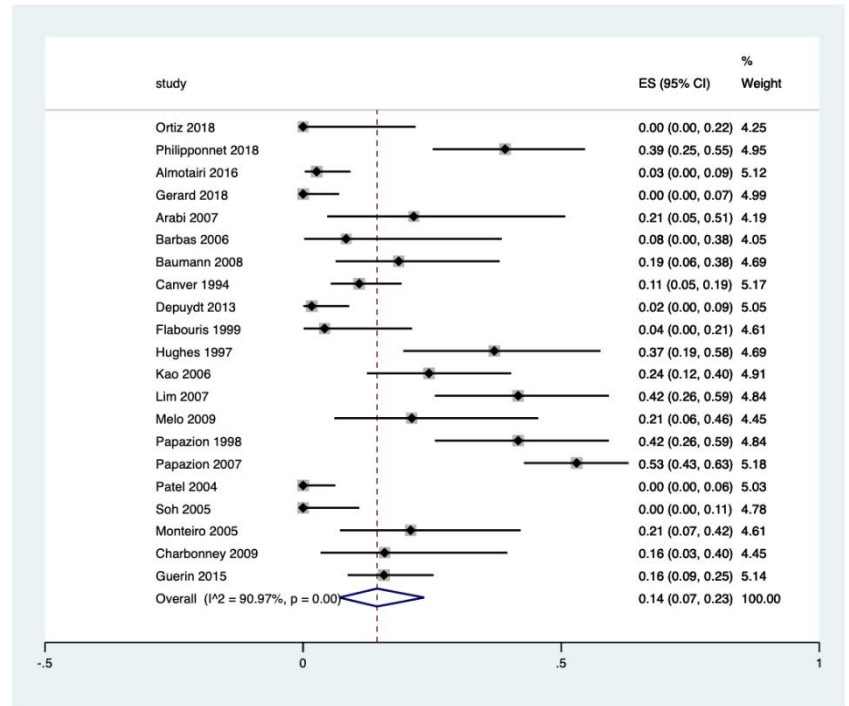

**Figure S8.** Pooled proportion of vasculitis on lung biopsy.

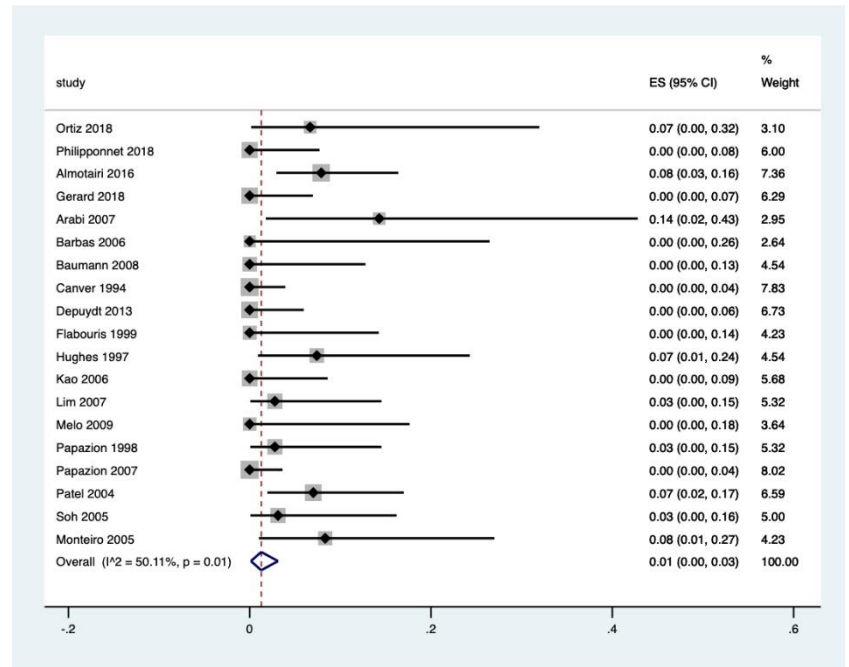

**Figure S9.** Pooled proportion of cryptogenic organizing pneumonia on lung biopsy.

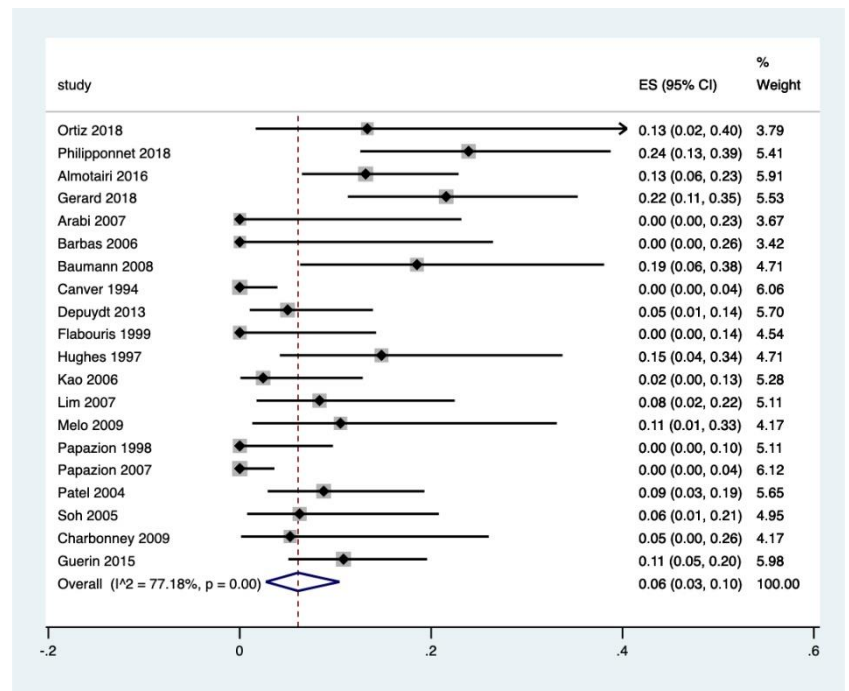

**Figure S10.** Pooled proportion of hemothorax secondary lung biopsy procedure.

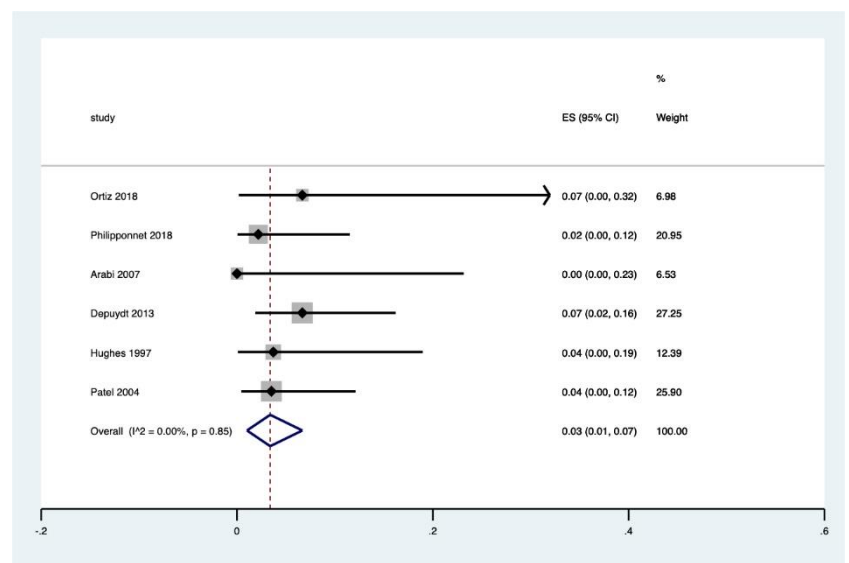

**Figure S11.** Pooled proportion of pneumothorax secondary lung biopsy procedure.

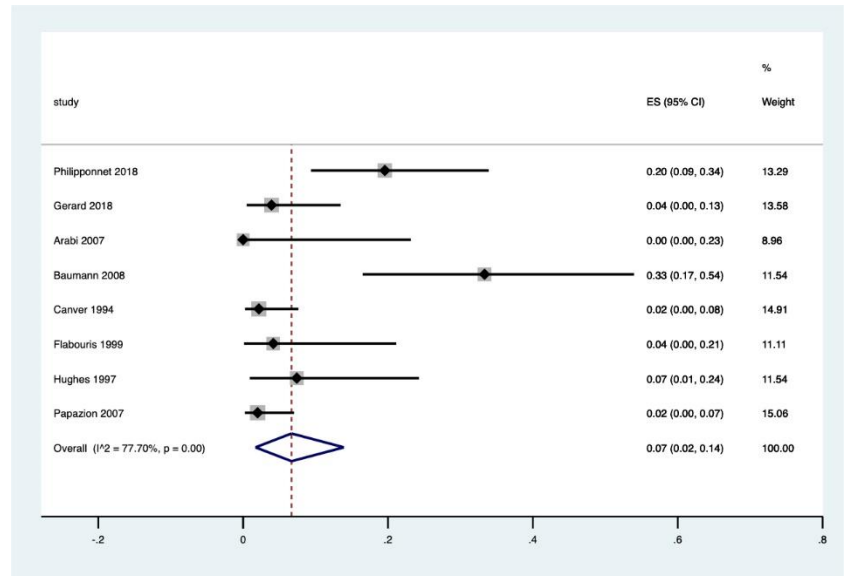

**Figure S12.** Univariate regression: air leak with study type; results were insignificant.

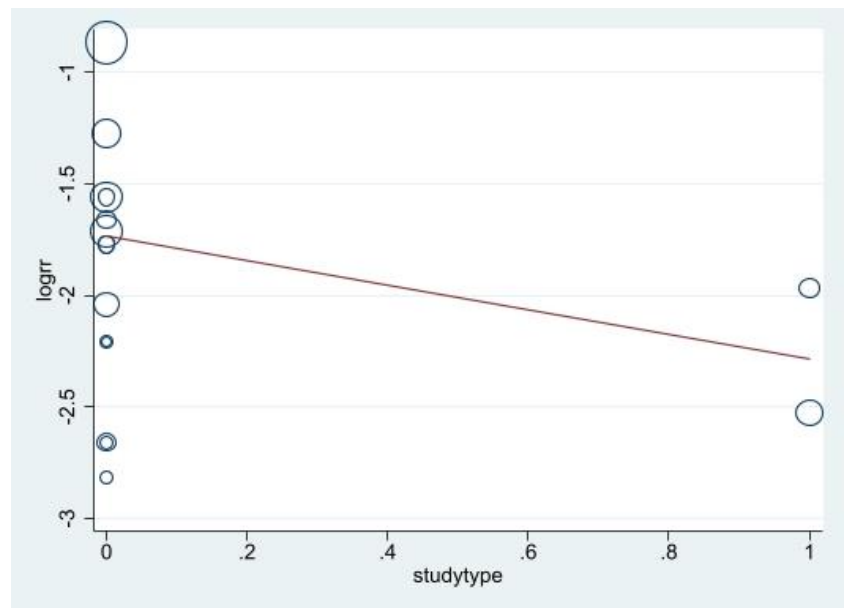



**Figure S13.** Univariate regression: air leak with gender; results were insignificant.

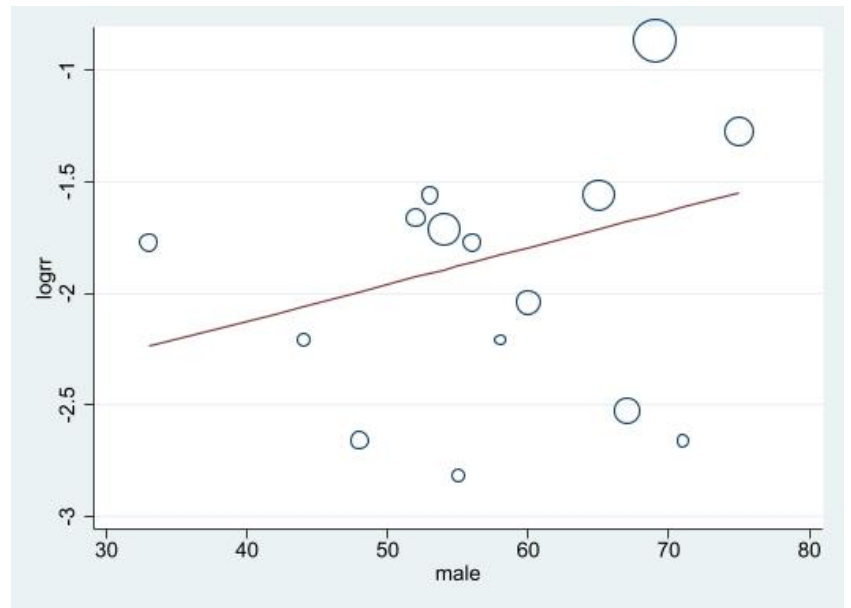

**Figure S14.** Univariate regression: air leak with age; results were insignificant.

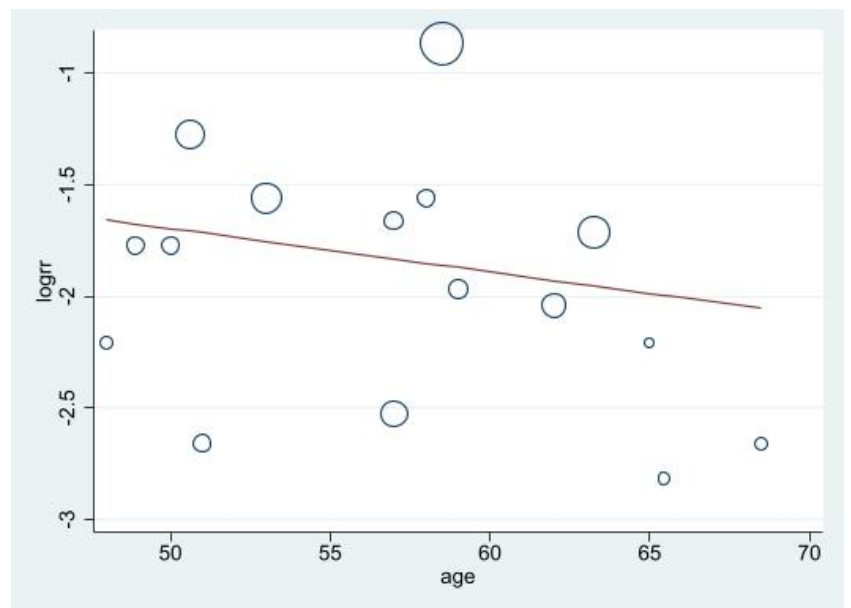

**Figure S15** Univariate regression: change in management. No effects on results were seen from study type.

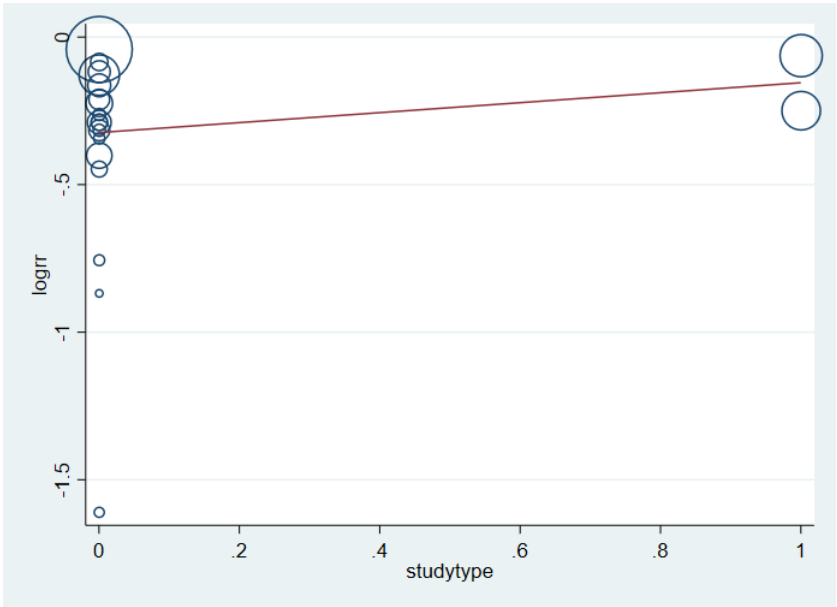

**Figure S16** Univariate regression: change in management. No effects on results were seen from gender.

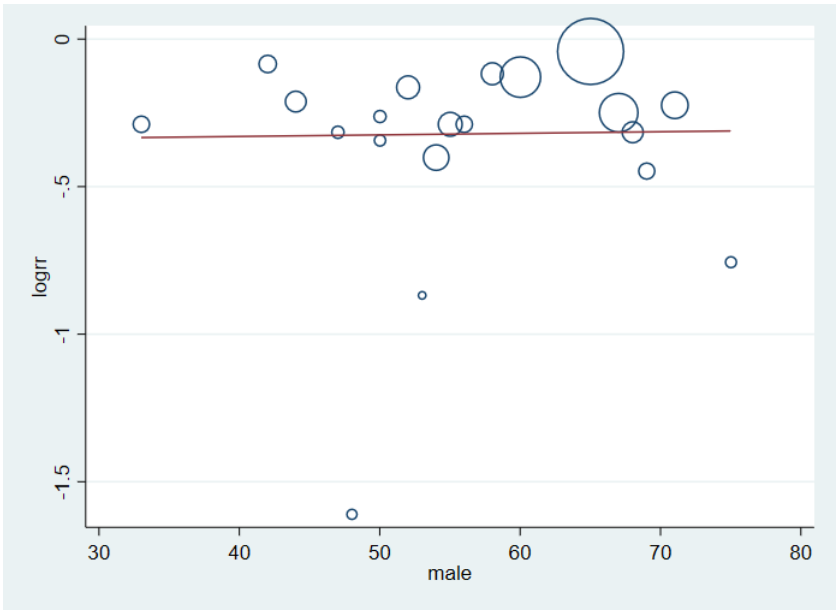

**Figure S17.** Univariate regression: change in management. No effects on results were seen from age.

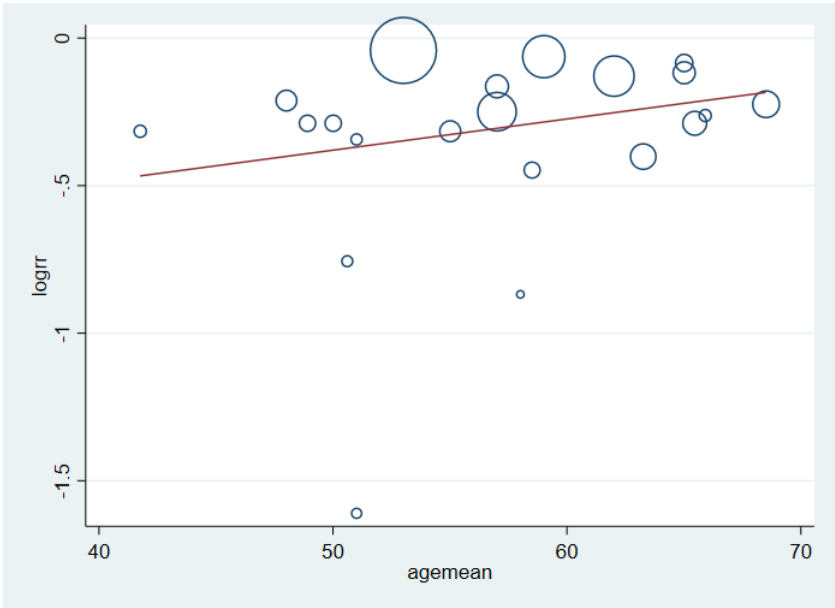

**Figure S18.** Univariate regression: complication rate. No effects on results were seen from study type.

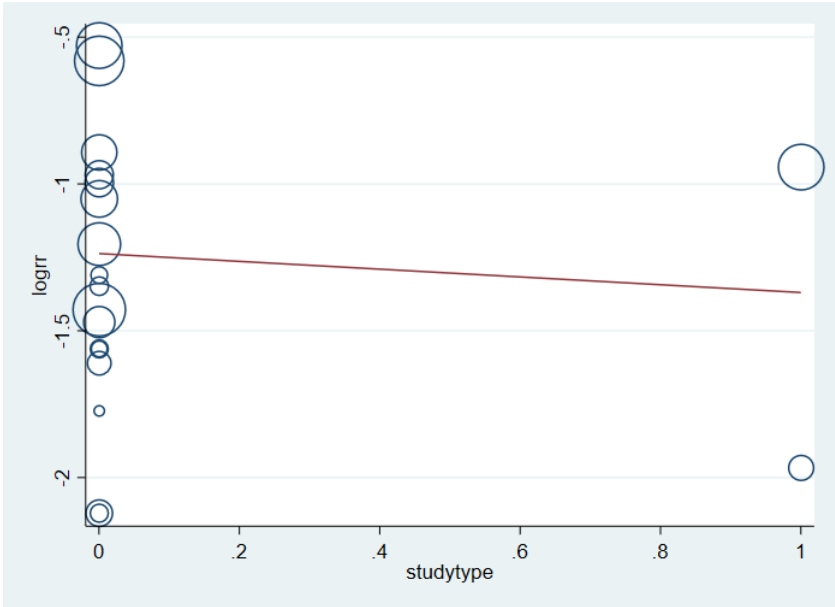

**Figure S19.** Univariate regression: complication rate. No effects on results were seen from gender.

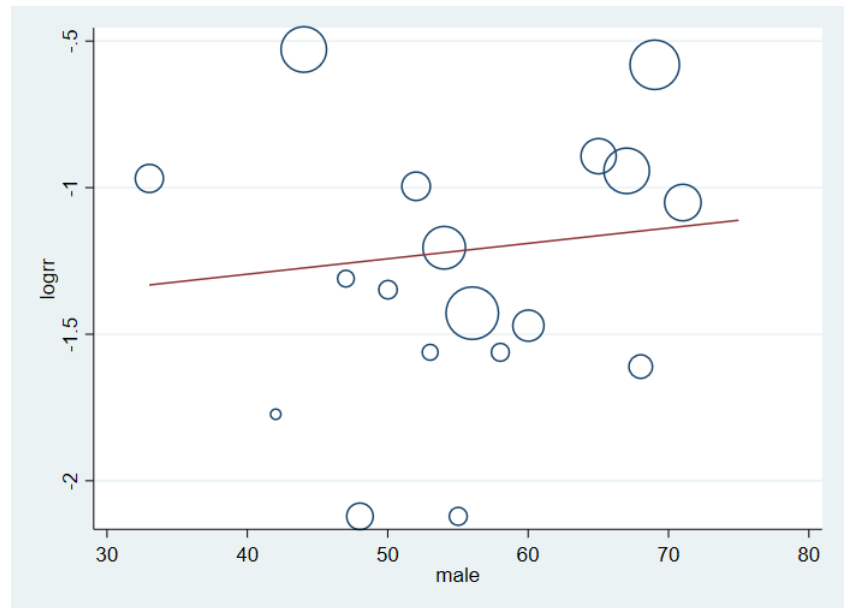

**Figure S20.** Univariate regression: complication rate. No effects on results were seen from age.

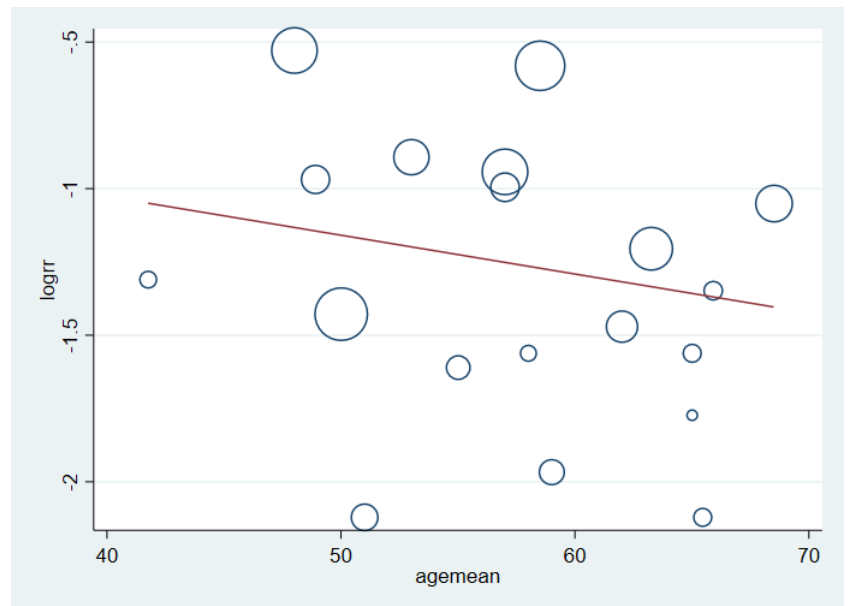

**Figure S20.** Univariate regression: mortality rate. No effects on results were seen from study type.

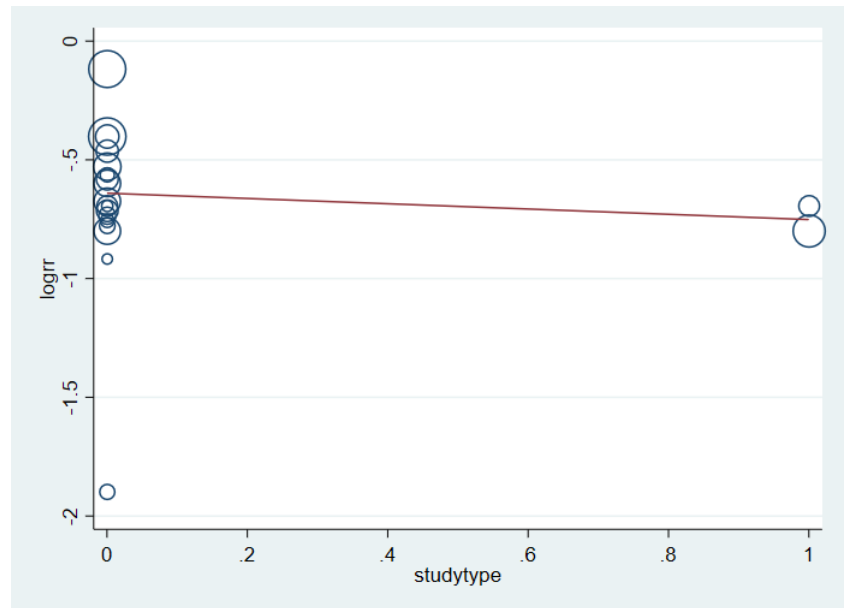

**Figure S21.** Univariate regression: mortality rate. No effects on results were seen from gender.

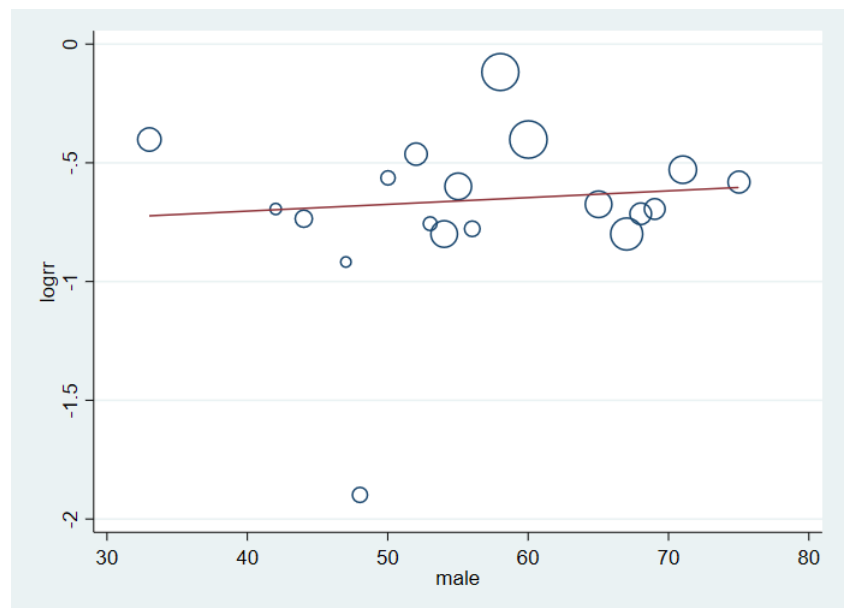

**Figure S22.** Univariate regression: mortality rate. No effects on results were seen from age.

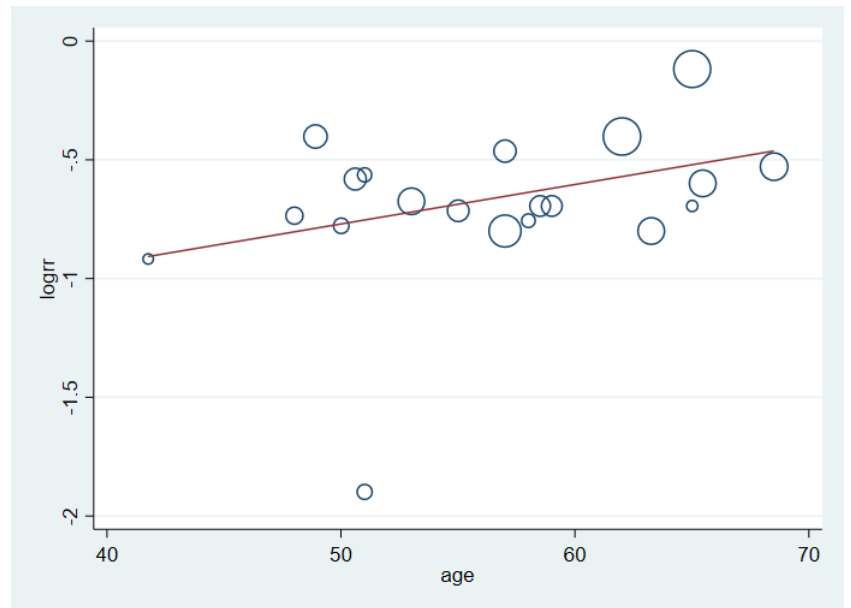

Supplement: s1 [file s1]
